# Supplementary material
Source: Springer Nature journal article supplement (https://www.springermedizin.de/resource/supplementary/12895_2014_170_MOESM2_ESM.pdf/9514260)

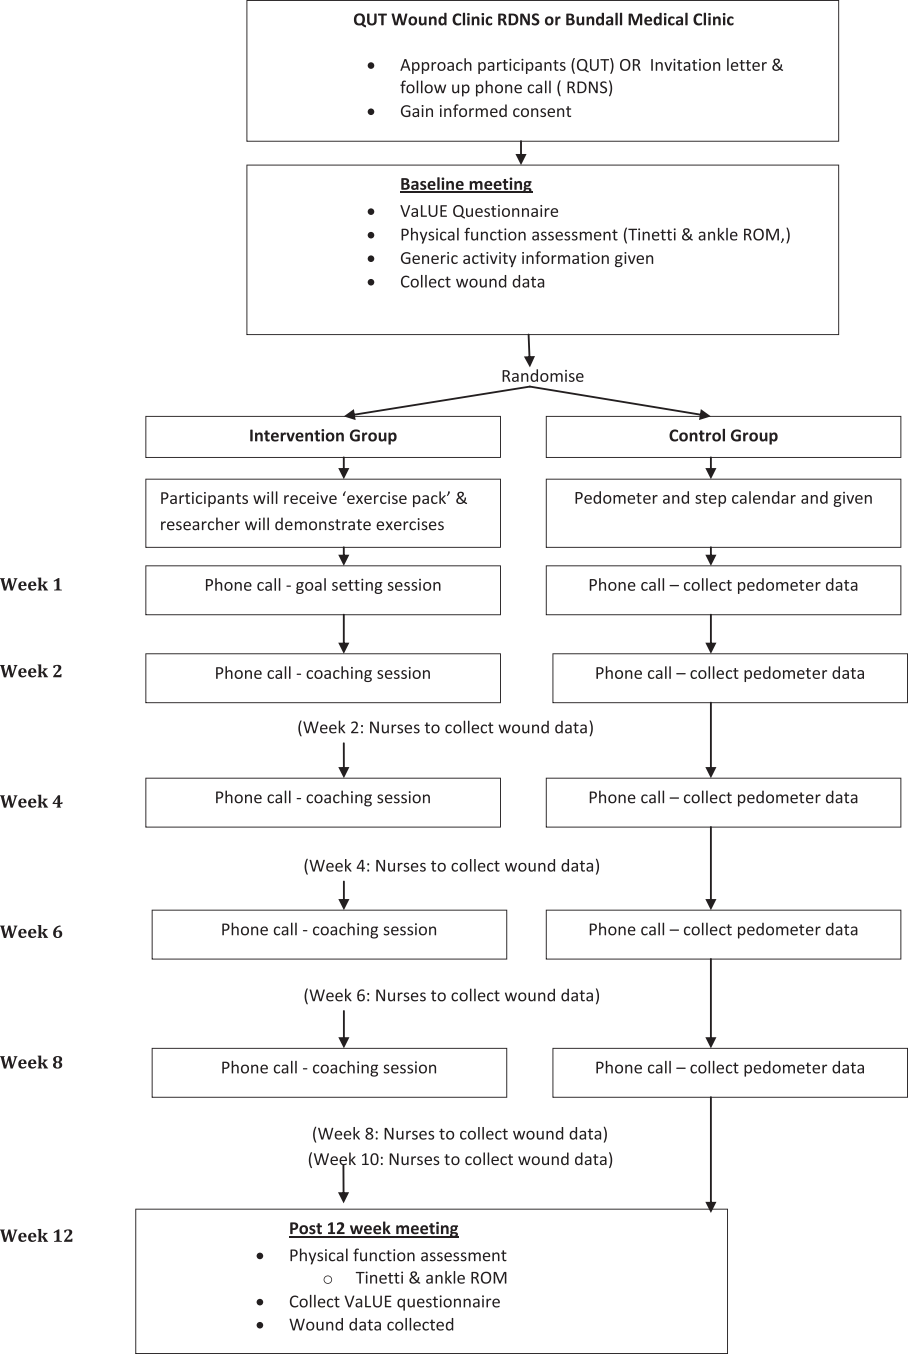

Supplement: MOESM2 [file 9514260]
